# Supplementary material for: DNA methylation footprints during soybean domestication and improvement
Source: PubMed Central journal article supplement (PMC6130073; doi:10.1186/s13059-018-1516-z), 2018-09-10
Supplement: 13059_2018_1516_MOESM3_ESM.pdf [file 13059_2018_1516_MOESM3_ESM.pdf]

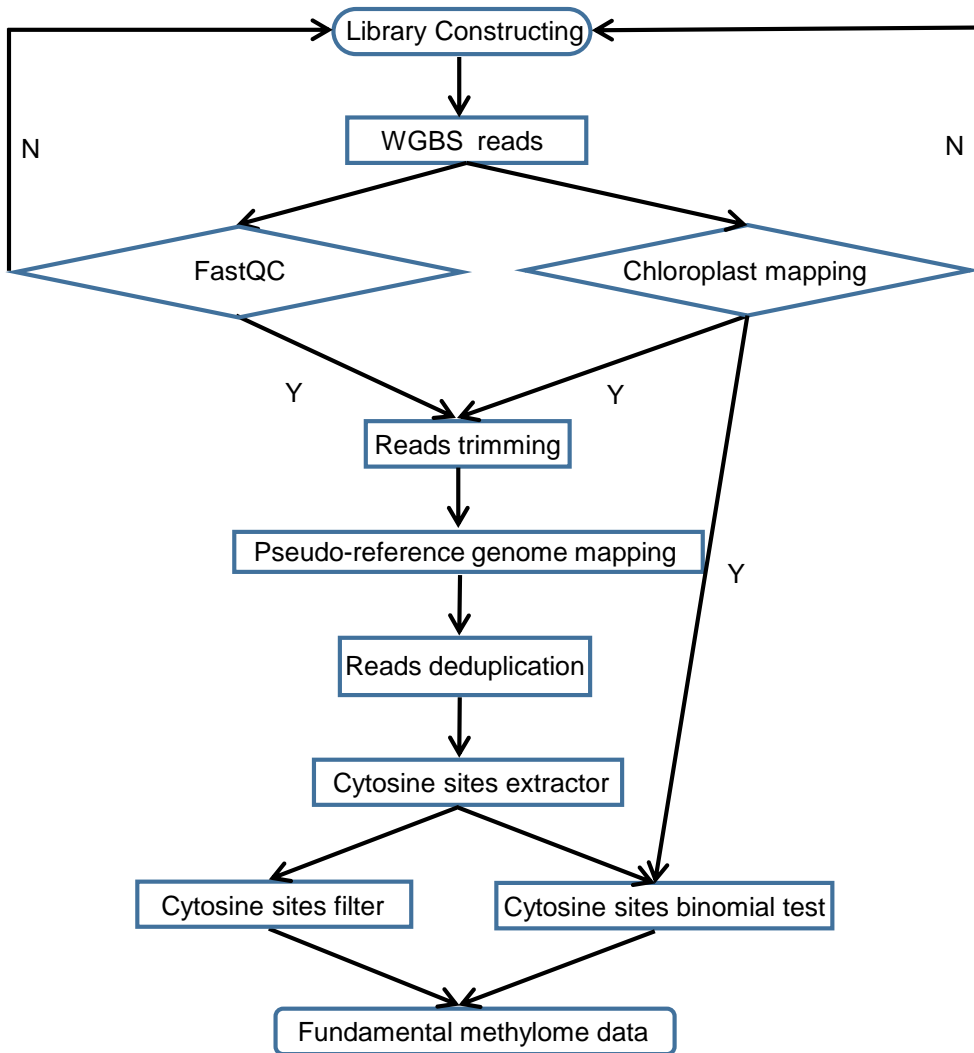

**Figure S1. Pipeline for WGBS analysis**

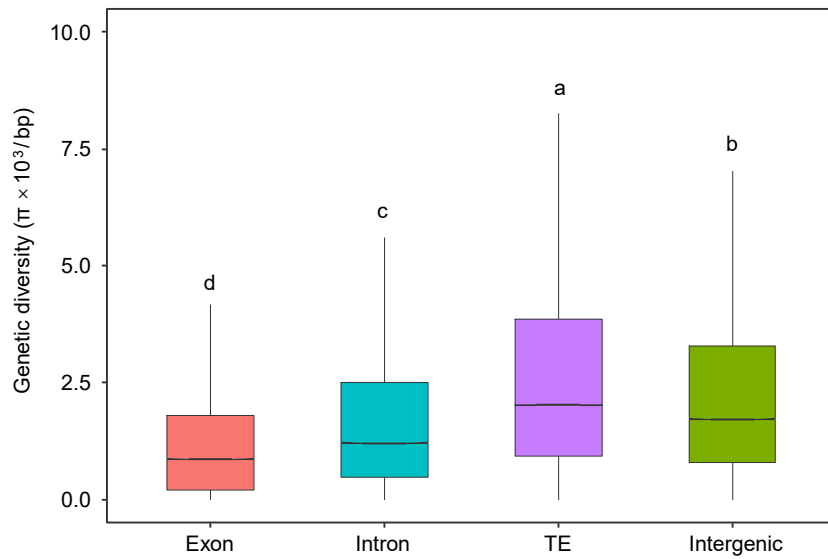

**Figure S2. Genetic diversity difference among different genomic regions.** To have a statistical significance, we divided soybean genome into continuous 500bp windows and only windows overlapped more than 80% by specific genomic region type were retained for this analysis. The different letters on top of each column indicate significant differences in ANOVA test ( $p < 0.01$ ).

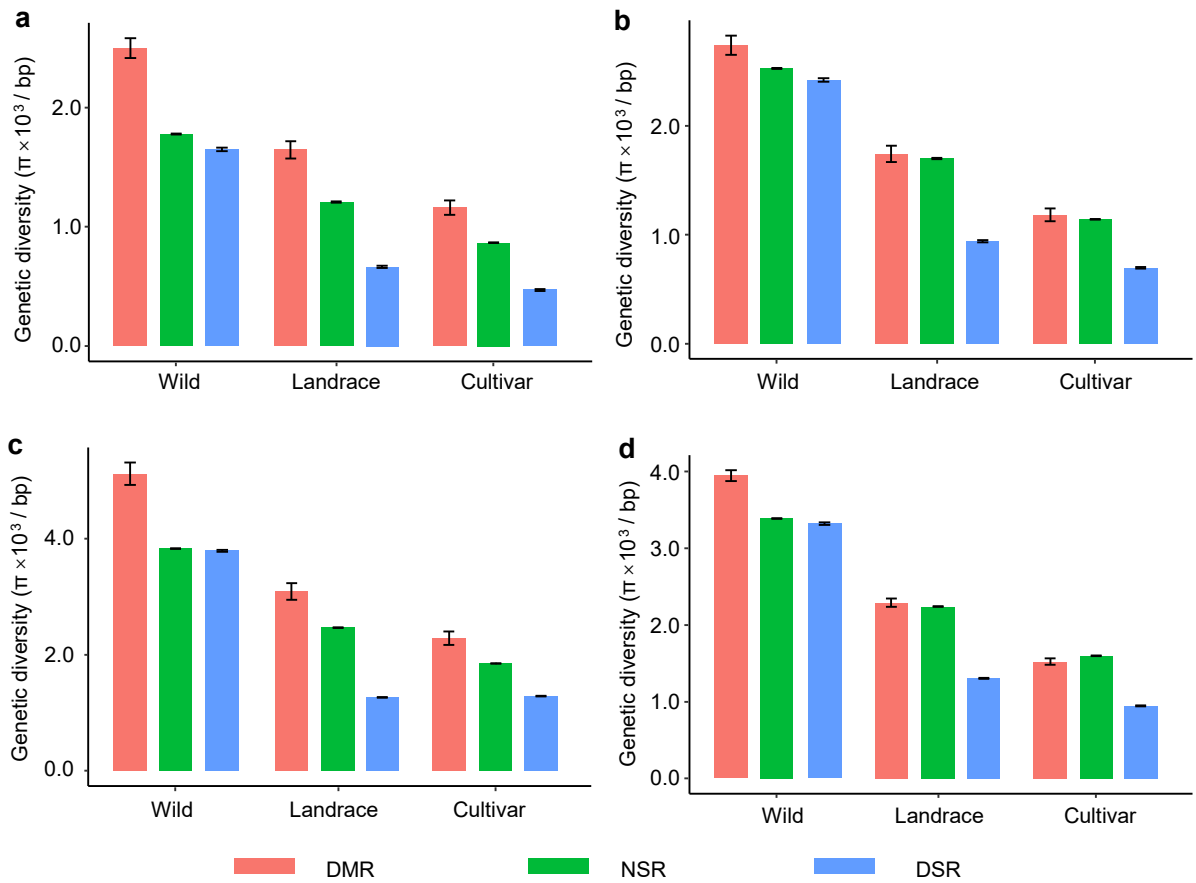

**Figure S3. Genetic diversity comparison between DMR, DSR and NSR in wild, landrace and cultivar populations. a Exon region. b Intron region. c TE region. d Intergenic region.**

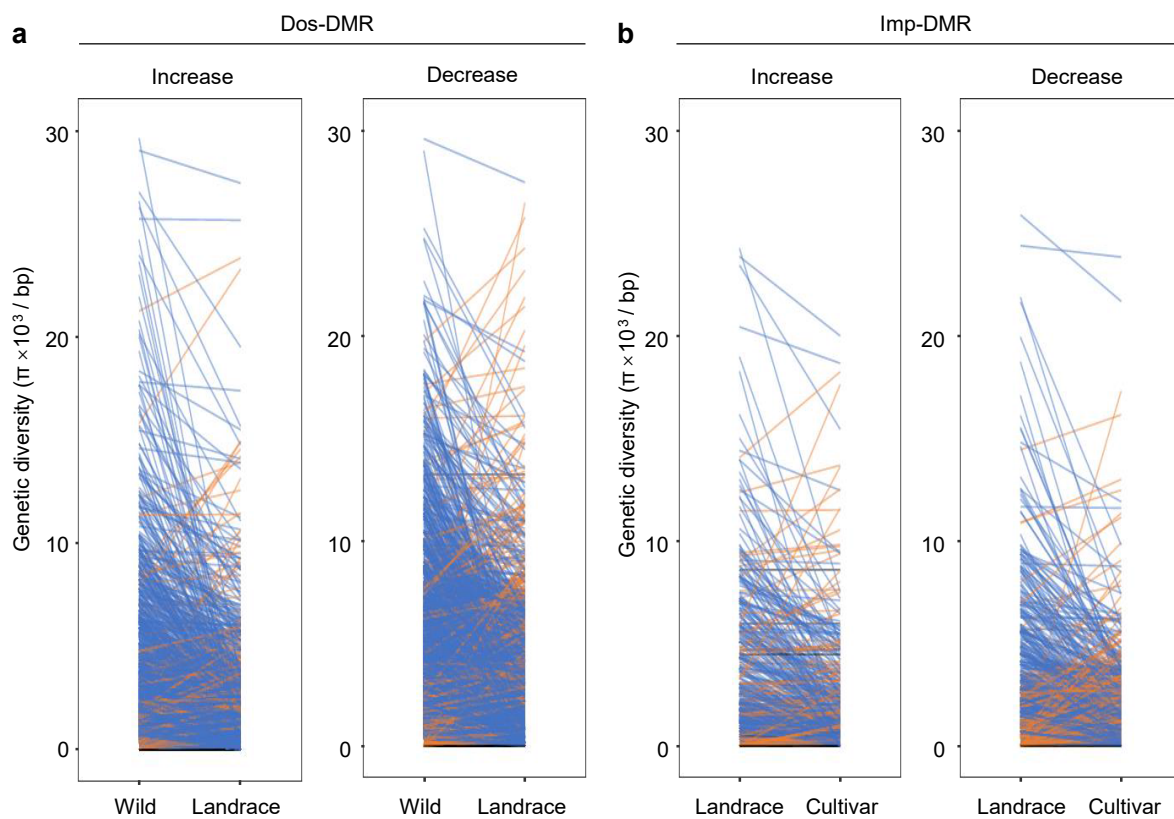

**Figure S4. The genetic diversity changes between corresponding populations for increased and decreased DMRs. a** Genetic diversity changes in domestication process. **b** Genetic diversity changes in improvement process. Each line in the panels indicates one DMR.

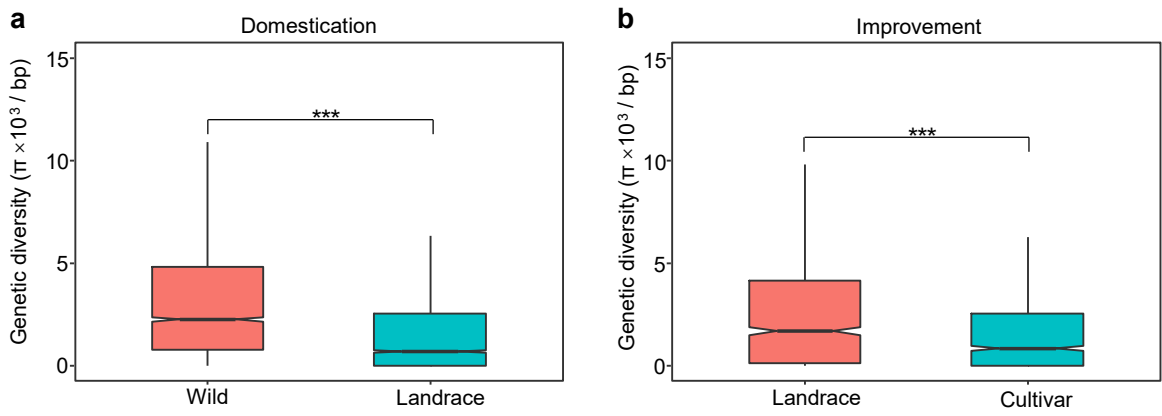

**Figure S5. The genetic diversity comparisons between corresponding populations for domestication DMRs (a) and improvement DMRs (b). \*\*\* denoted t-test  $p < 0.001$ .**

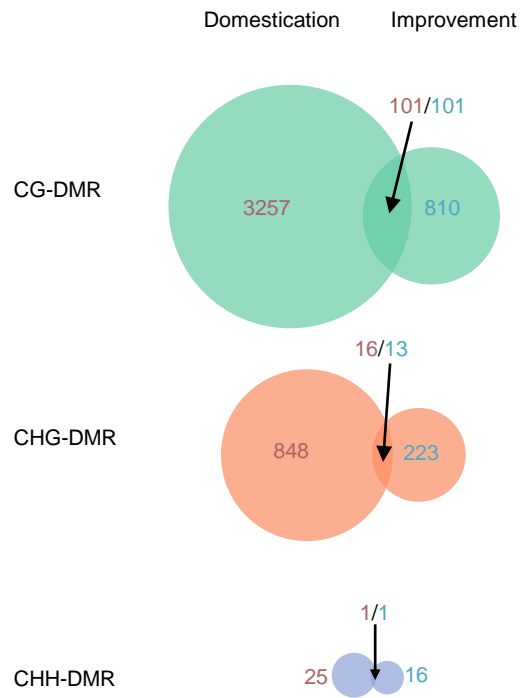

**Figure S6. Overlap between domestication and improvement DMRs for different cytosine contexts.**

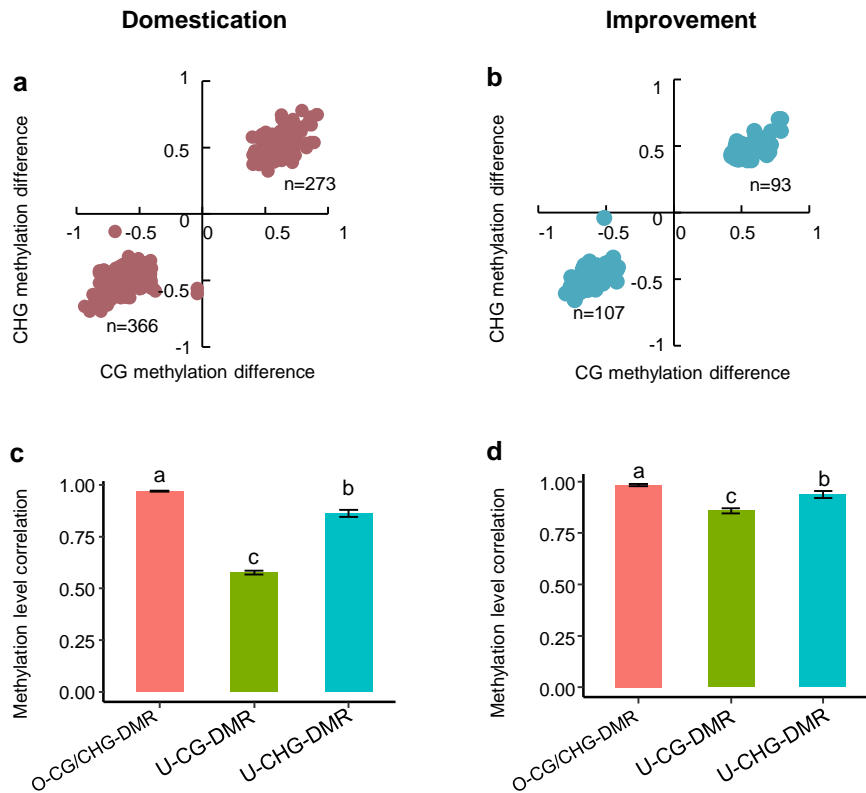

**Figure S7. Relationship of CG and CHG methylation levels for overlapped CG-DMRs and CHG-DMRs.** **a** CG methylation difference (x axis) and CHG methylation difference (y axis) between wild and landrace (wild-landrace) from domestication process. **b** CG methylation difference (x axis) and CHG methylation difference (y axis) between landrace and cultivar (landrace-cultivar) from improvement process. **c** Pearson correlation for CG and CHG methylation level in overlapped CG-DMRs and CHG-DMRs, unique CG-DMRs and unique CHG-DMRs from domestication process. **d** Pearson correlation for CG and CHG methylation level in overlapped CG-DMRs and CHG-DMRs, unique CG-DMRs and unique CHG-DMRs from improvement process. The different letters on top of each column indicate significant differences in ANOVA test ( $p < 0.01$ ). The bars indicate standard error.

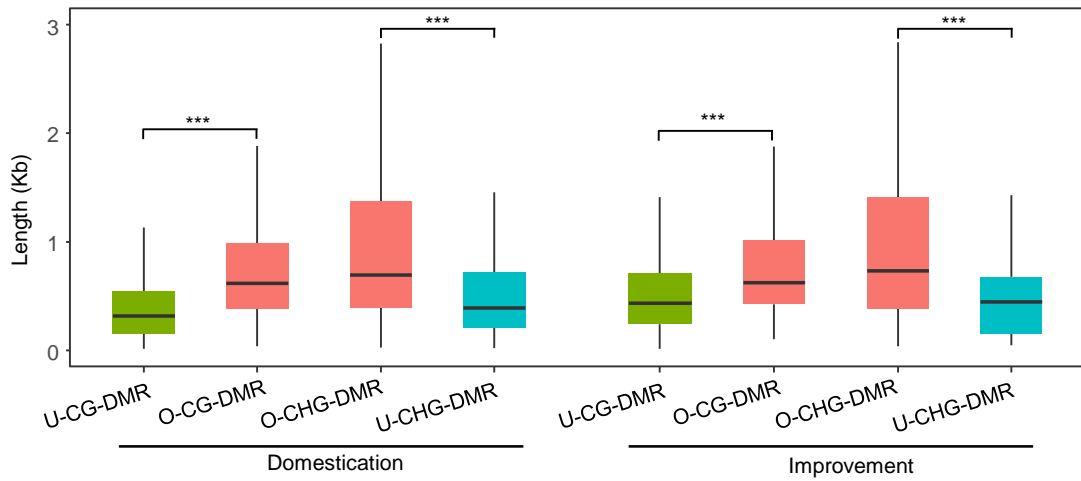

**Figure S8. Length comparisons among overlapped CG-DMRs and CHG-DMRs, unique CG-DMRs and unique CHG-DMRs. \*\*\* denoted t-test  $p < 0.001$ .**



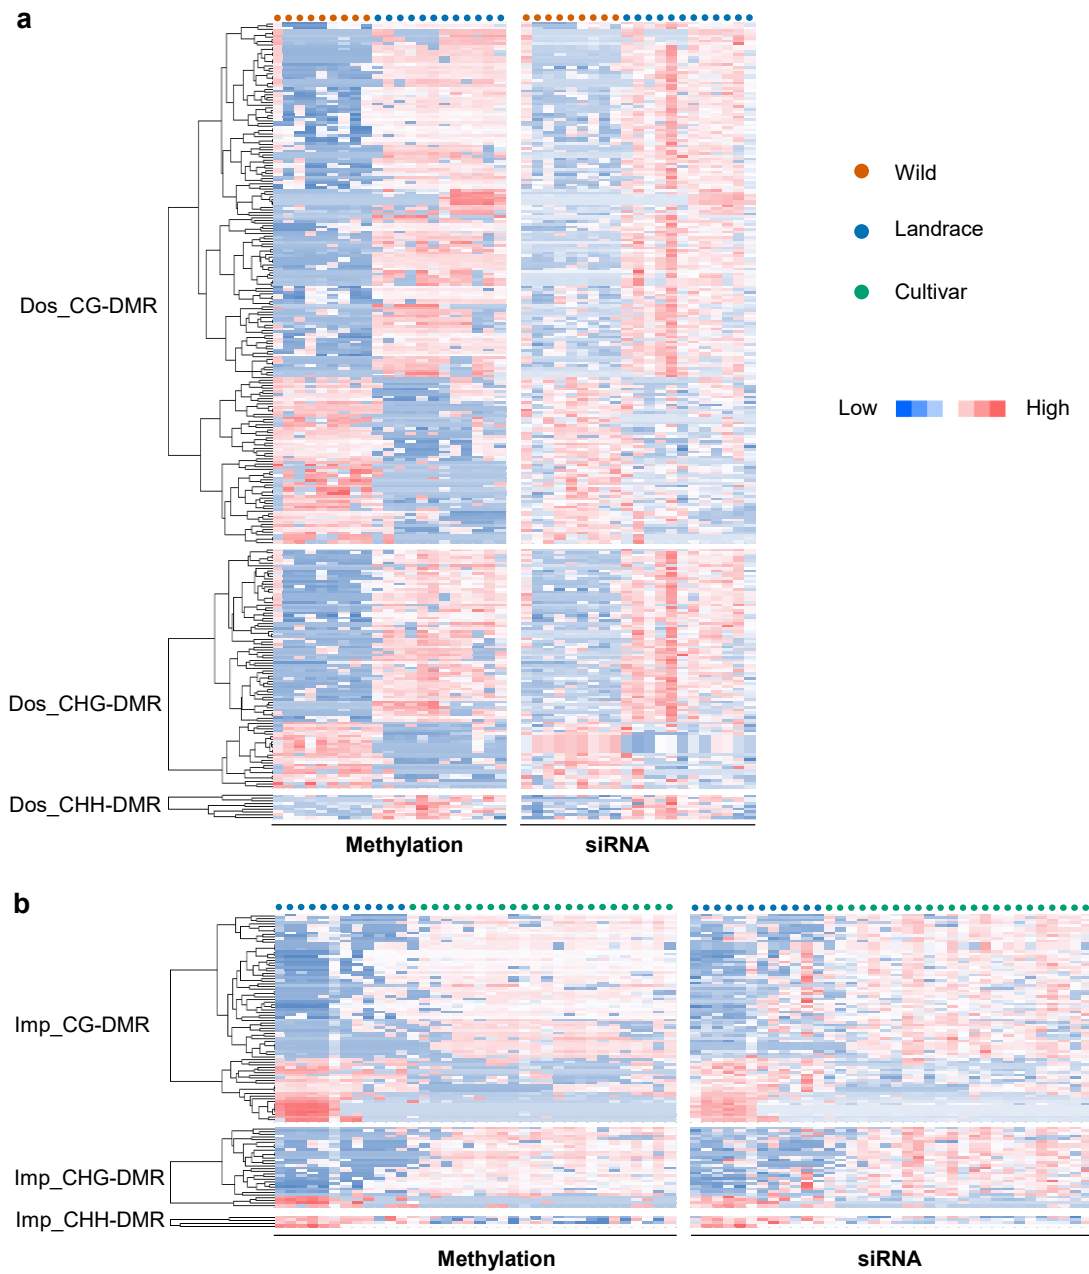

**Figure S9. Hierarchical clustering of methylation level and corresponding siRNA expression for associated DMR/siRNA pairs in domestication (a) and improvement (b).**

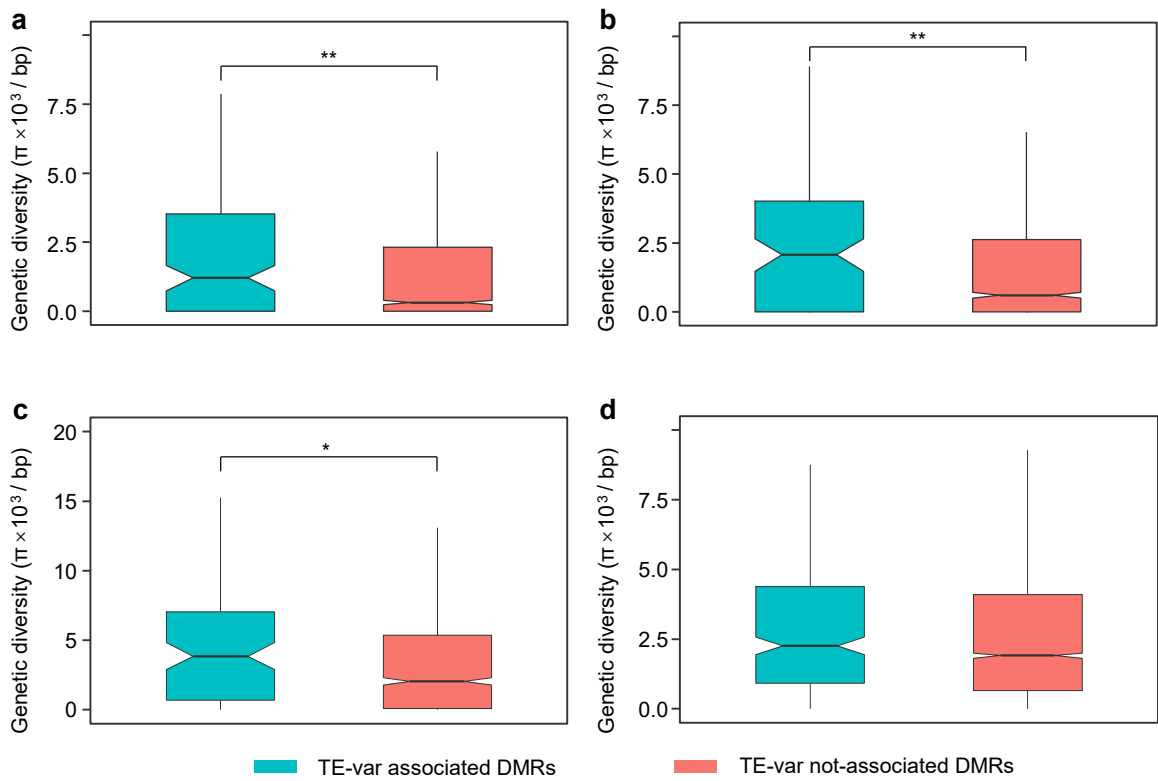

**Figure S10. The genetic diversity difference between TE variant associated DMRs and TE variant not-associated DMRs for different genomic regions. a** Exon region. **b** Intron region. **c** TE region. **d** Intergenic region. \* denoted t-test  $p < 0.05$ , \*\* denoted t-test  $p < 0.01$ .

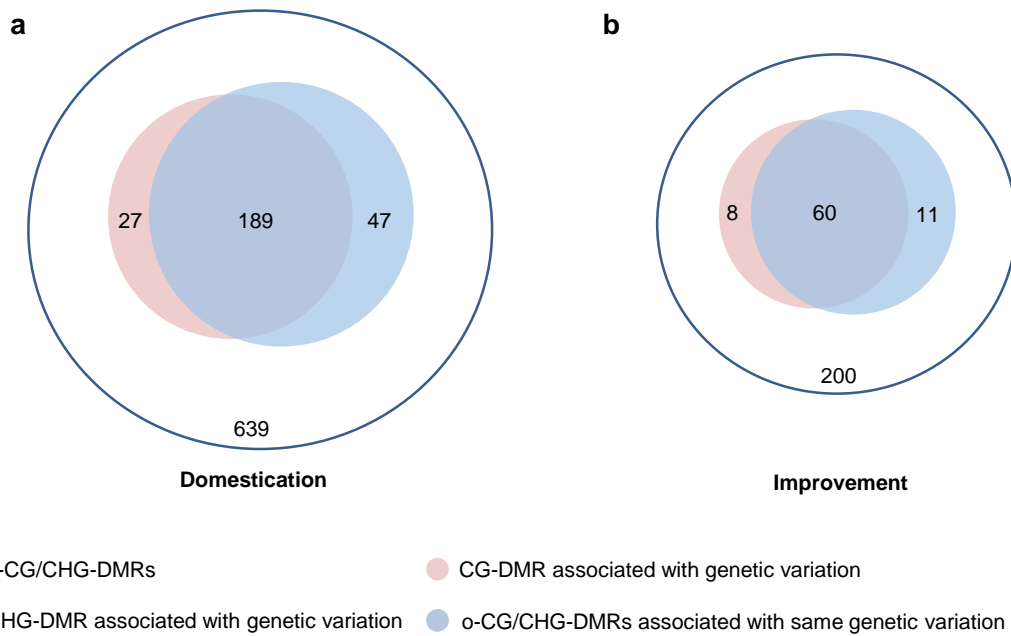

**Figure S11. Overlap between overlapped CG-DMRs and CHG-DMRs (O-CG/CHG DMRs) who associated with genetic variations for domestication (a) and improvement (b).**

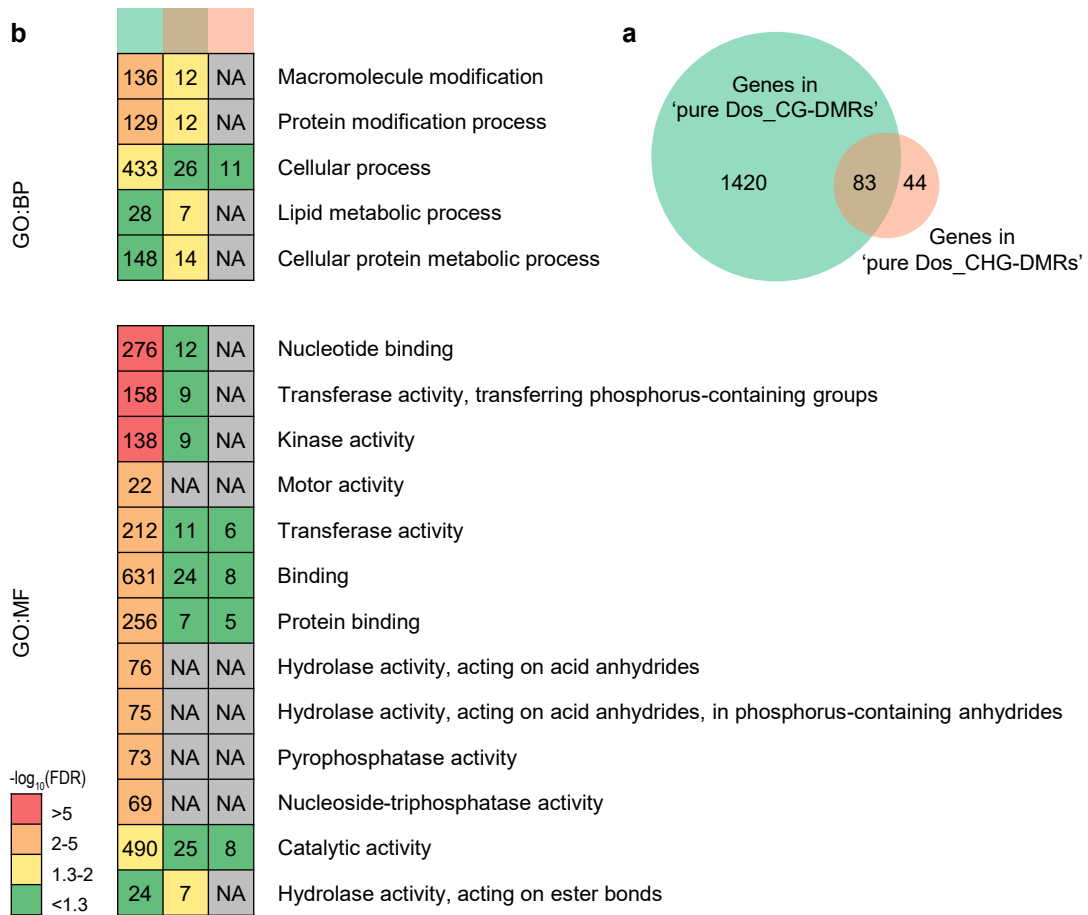

**Figure S12. Overlap and GO enrichment analysis for genes in 'pure Dos\_CG-DMRs' and 'pure Dos\_CHG-DMRs'.** **a** The overlap genes in 'pure Dos\_CG-DMRs' and in 'pure Dos\_CHG-DMRs'. **b** GO enrichment analysis of the overlapped and non-overlapped genes. The number in each cell is the gene number belonging to corresponding GO term. GO terms contained more than 5 analyzed genes and enrichment q value less than 0.05 are considered as significant enrichment; GO:BP denotes GO terms for biological process and GO:MF denotes GO terms for molecular function.

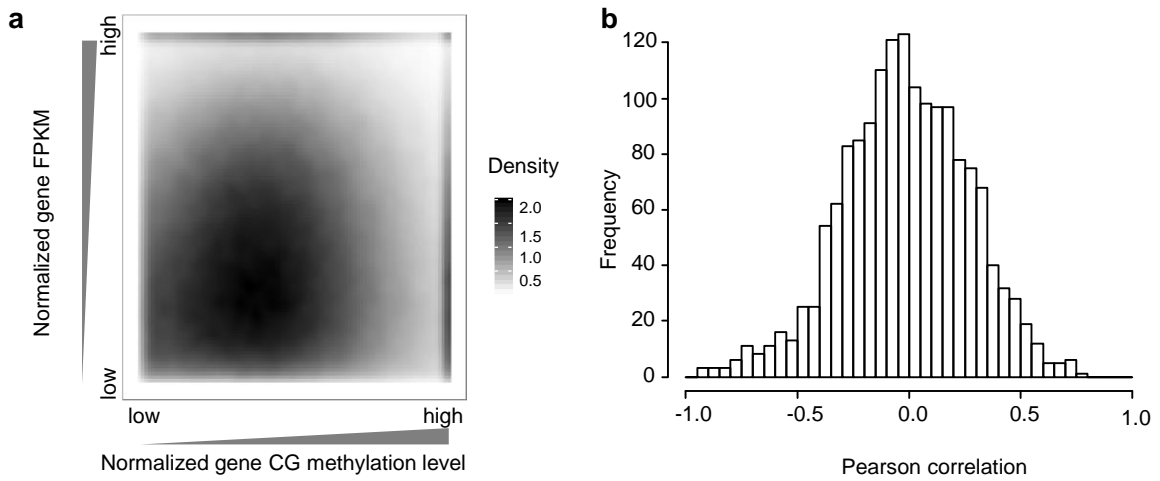

**Figure S13. The correlation between CG methylation level and expression level for genes in 'pure DMRs'. a** Density plot for scale normalized gene CG methylation level (x axis) and scale normalized expression value (y axis). **b** Histogram of Pearson correlation coefficient between gene CG methylation level and expression level.
